# Supplementary material
Source: publisher figshare collection journal article supplement (https://acs.figshare.com/ndownloader/files/4385131)
Supplement: Supplementary file 1 [file 4385131]

## Supporting information

### **Predicting acidification recovery at the Hubbard Brook Experimental Forest, New Hampshire, USA: Evaluation of four models**

Koji Tominaga<sup>†</sup>, Julian Aherne<sup>†</sup>, Shaun A. Watmough<sup>†</sup>, Mattias Alveteg<sup>‡</sup>, Bernard J. Cosby<sup>§</sup>, Charles T. Driscoll<sup>#</sup>, Maximilian Posch<sup>⊥</sup>, and Afshin Pourmokhtarian<sup>#</sup>

<sup>†</sup> Environmental and Life Sciences, Trent University, 1600 West Bank Drive, Peterborough, Ontario, K9J 7B8

<sup>‡</sup> Department of Chemical Engineering, Lund University, P.O. Box 124, Lund 221 00, Sweden

<sup>§</sup> Environmental Sciences Department, University of Virginia, 291 McCormick Road, Charlottesville, Virginia, 22904-4123, USA

<sup>#</sup> Department of Civil and Environmental Engineering, Syracuse University, Syracuse, New York, 13244-1190, USA

<sup>⊥</sup> Coordination Centre for Effects (CCE), National Institute for Public Health and the Environment (RIVM), P.O. Box 1, 3720 BA Bilthoven, The Netherlands

Model configuration and calibration:

Table S1. Description of MAGIC, PnET-BGC, SAFE and VSD and their configuration in the current study.

Table S2. Model calibration success rate against behavioral criteria.

**Model configurations.** Key features are described in detail in Table S1, along with the configurations used in the current study.

**Table S1.** Model description of MAGIC, PnET-BGC, SAFE and VSD; configurations for the current study are given in parentheses (if ambiguous).

| Features                                                                        | MAGIC                                             | PnET-BGC                                       | SAFE                                                    | VSD                                               |
|---------------------------------------------------------------------------------|---------------------------------------------------|------------------------------------------------|---------------------------------------------------------|---------------------------------------------------|
| Number of soil layers                                                           | Up to 3 (1)                                       | 2 (organic and mineral)                        | Up to 20 (1)                                            | 1                                                 |
| Temporal resolution                                                             | Annual, monthly (annual)                          | Monthly                                        | Annual                                                  | Annual                                            |
| Base cation weathering                                                          | Calibrated, or external-input (external input)    | External input                                 | Sub-model or external input (external input)            | External input                                    |
| Forest nutrient uptake                                                          | External input                                    | Sub-model                                      | External input                                          | External input                                    |
| Runoff to precipitation ratio                                                   | External input (proportional precipitation)       | External input to (proportional precipitation) | Fixed ratio                                             | External input to (proportional precipitation)    |
| Sulfate adsorption                                                              | Langmuir isotherm                                 | Yes                                            | Yes (not used)                                          | Not included                                      |
| N immobilization                                                                | Fractional, fixed, or external input (fractional) | Sub-model                                      | Available in previous versions (not used in this study) | Fractional, fixed, or external input (fractional) |
| Nitrification                                                                   | Fractional (100 %)                                | Sub-model                                      | Always, or own sub-model (fractional 100 %)             | 100 %                                             |
| Denitrification                                                                 | Fractional (none)                                 | Sub-model                                      | None or own sub-model (none)                            | Fractional, fixed (none)                          |
| Soil N build-up controlled by C:N ratio                                         | Yes (not used)                                    | Sub-model                                      | No                                                      | Yes (not used)                                    |
| CO <sub>2</sub> degassing in surface water                                      | Yes                                               | Yes                                            | Yes                                                     | Yes                                               |
| Al(OH) <sub>3</sub> precipitation in stream                                     | Yes                                               | No                                             | Yes                                                     | Yes                                               |
| Lumped base cations (Ca <sup>2+</sup> , Mg <sup>2+</sup> , and K <sup>+</sup> ) | No                                                | No                                             | Yes                                                     | Yes                                               |
| DOC dissociation model                                                          | Triprotic                                         | Triprotic                                      | Oliver                                                  | Oliver, or simple monoprotic (Oliver)             |
| DOC-Al complexation                                                             | Yes                                               | Yes                                            | No                                                      | No                                                |
| Cation exchange                                                                 | Gaines-Thomas                                     | Gaines-Thomas                                  | Gapon                                                   | Gaines-Thomas or Gapon (Gapon)                    |
| Cation exchange equations                                                       | 4                                                 | 6                                              | 1                                                       | 2                                                 |

|                                                  |      |      |      |      |
|--------------------------------------------------|------|------|------|------|
| Ions in soil solution charge balance             | 28   | 29   | 16   | 12   |
| First appearance in the peer-reviewed literature | 1985 | 1991 | 1993 | 2009 |

**Model calibration.** The calibration success rate, i.e., percentage of simulations ( $n = 10000$ ) that met the calibration criteria (Table 2), varied by model and simulated variable (Table S2). The low success rate for stream  $\text{Na}^+$  concentration simulated by MAGIC (11.8 %) compared with the other models (71.3–76.3 %) suggests that the initial parameter distributions, in particular,  $\text{Na}^+$  weathering and initial exchangeable  $\text{Na}^+$  fraction, were poorly defined for MAGIC (Table 1); stream  $[\text{Na}^+]$  is primarily characterized by  $\text{Na}^+$  deposition, exchange on soil surface complex (VSD and SAFE do not model  $\text{Na}^+$  exchange, Table S1) and weathering, but is also influenced by a variety of factors such as acidic deposition flux and soil solution parameters (e.g., dissolved organic carbon concentration,  $\text{pCO}_2$ , and gibbsite dissolution constant). These factors are modeled differently by each model.

**Table S2.** Success rates (%) for calibration criteria by simulated variables and model ( $n = 10000$ ). Model simulations that were successful for all variables were considered behavioral (see Table 2).

| Variable                                                                                         | MAGIC | PnET-BGC | SAFE | VSD  |
|--------------------------------------------------------------------------------------------------|-------|----------|------|------|
| Soil base saturation (%)*                                                                        | 17.4  | 43.4     | 50.3 | 64.9 |
| Surface water pH                                                                                 | 15.1  | 30.7     | 36.1 | 17.4 |
| Surface water $[\text{Bc} (\text{Ca}^{2+} + \text{Mg}^{2+} + \text{K}^+)] (\mu\text{eq L}^{-1})$ | 11.4  | 49.5     | 21.2 | 5.1  |
| Surface water $[\text{Na}^+] (\mu\text{eq L}^{-1})$                                              | 11.8  | 71.3     | 76.3 | 76.3 |
| Surface water $[\text{SO}_4^{2-}] (\mu\text{eq L}^{-1})$                                         | 25.9  | 35.4     | 49.1 | 49.6 |
| Surface water $[\text{ANC}] (\mu\text{eq L}^{-1})$                                               | 12.5  | 27.2     | 29.5 | 18.2 |

|               |     |     |     |     |
|---------------|-----|-----|-----|-----|
| All variables | 0.3 | 0.4 | 1.7 | 0.5 |
|---------------|-----|-----|-----|-----|

\* Base saturation is the percentage of the cation exchange capacity occupied by base cations ( $\text{Ca}^{2+} + \text{Mg}^{2+} + \text{K}^+$ )

Another notable instance is the low success rate of VSD for stream [Bc =  $\text{Ca}^{2+} + \text{Mg}^{2+} + \text{K}^+$ ] (5.1 %), again indicating poor initial parameter distribution compatibility for VSD with respect to the simulation of stream [Bc]. Similar to  $[\text{Na}^+]$ , stream [Bc] is characterized by a series of factors, and the formulations of these processes differ substantially between models. Moreover, despite only a slight difference in the cation exchange formulation between SAFE [3] and VSD [4] in this study (Table 1), a substantial difference in the stream [Bc] success rate for SAFE (21.2 %) and VSD (5.1 %) was observed.

In the current study, the success rates for individual chemical variables were relatively high for PnET-BGC and SAFE, but their success rate for all variables (i.e., satisfying all criteria, 0.4 % and 1.7 %, respectively) was as low as for the other models (MAGIC, 0.3 % and VSD, 0.5 %). The behavioral parameter sets were limited by their initial distributions, and therefore the success rates are not indicative of each model's true calibration efficiency.
